# Supplementary material for: What are the limits on whale ear bone size? Non-isometric scaling of the cetacean bulla
Source: PeerJ. 2021 Feb 5;9:e10882. doi: 10.7717/peerj.10882 (PMC7869665; doi:10.7717/peerj.10882)
Supplement: Supplemental Information 3 — Measurements of bulla length, bulla width, and bizygomatic width. [file peerj-09-10882-s003.xlsx]

## Sheet: Sheet1
genus	species	BZW (mm)	right BL (mm)	left BL (mm)	mean BL (mm)	right BW (mm)	left BW (mm)	mean BW (mm)	specimen_number	source
Acrophyseter	robustus	385	43	0	43	0	0	0	MUSM 1399	Lambert et al. 2017
Acrophyseter	sp.	432	0	46	46	0	0	0	MUSM 2182	Lambert et al. 2017
Acrophyseter	deinodon	466	40	0	40	20.5	0	20.5	MNHN SAS 1626	Lambert et al. 2017
Aetiocetus	cotylalveus	320	0	70	70	0	49	49	USNM 26351	This Study
Aetiocetus	cotylalveus	250	66	66	66	45	45	45	USNM 25210	This Study
Aetiocetus	cotylalveus	507	54	0	54	30	0	30	USNM 314627	This Study
Agorophius	sp.	212	45	45	45	32	32	32	USNM 256516	This Study
Albertocetus	meffordorum	173	47	47	47	30	31	30.5	USNM 525001	This Study
Argyrocetus	joaquinensis	182	45	45	45	26	26	26	USNM 11996	This Study
Arimidelphis	sorbinii	250	35.2	0	35.2	20	0	20	SAE 39756	Bianucci, 2005
Artiocetus	clavis	264	70	72	71	45	49	47	GSP 3458	This Study
Australodelphis	mirus	204	0	29.5	29.5	0	14	14	AGSO CPC 25730	Fordyce et al. 2002
Awamokoa	tokarahi	234	51.5	50	50.75	34	32.5	33.25	OU 22125	Tanaka & Fordyce, 2016
Balaenella	brachyrhynus	800	0	84	84	0	60	60	NMB 42001	Bisconti, 2005
Balaenoptera	physalus	301	88	89	88.5	55	55	55	USNM 268725	This Study
Balaenoptera	physalus	394	101	0	101	66	0	66	USNM 572539	This Study
Balaenoptera	edeni	874	73	0	73	45	0	45	USNM 239307	This Study
Balaenoptera	acutorostrata	627	70	70	70	50	50	50	USNM 571487	This Study
Balaenoptera	physalus	1430	92	92	92	40	40	40	USNM 504243	This Study
Balaenoptera	physalus	1505	102	102	102	64	64	64	USNM 16045	This Study
Balaenoptera	physalus	1525	80	80	80	52	52	52	USNM 237566	This Study
Balaenoptera	physalus	1905	80	80	80	47	47	47	USNM 504945	This Study
Balaenoptera	physalus	2160	125	125	125	75	75	75	USNM 550467	This Study
Berardius	bairdii	625	0	61	61	0	41	41	USNM 550888	This Study
Berardius	bairdii	676	59	59	59	39	39	39	USNM 571544	This Study
Berardius	bairdii	681	74	74	74	39	39	39	USNM 571542	This Study
Brandtocetus	chongulek	372	0	65	65	0	46	46	TNU Skull 4	Goldin & Startsev, 2014
Brandtocetus	chongulek	470	0	59	59	0	43	43	TNU Skull 2	Goldin & Startsev, 2014
Brujadelphis	ankylorostris	168	0	36.5	36.5	21.2	0	21.2	MUSM 1400	Lambert et al. 2017
Carolinacetus	gingerichi	256	71.2	0	71.2	28.5	0	28.5	ChM PV5401	Geisleret al. 2005
Cephalorhynchus	hectori	76	25	0	25	15	0	15	USNM 571650	This Study
Cephalorhynchus	commersoni	105	27	27	27	15	15	15	USNM 484889	This Study
Cephalorhynchus	commersoni	108	25	25	25	16	16	16	USNM 550154	This Study
Cephalorhynchus	hectori	124	27	0	27	16	0	16	USNM 500864	This Study
Cephalorhynchus	commersoni	126	0	26	26	0	20	20	USNM 252368	This Study
Cephalorhynchus	eutropia	128	25	25	25	16	16	16	USNM 395374	This Study
Cephalorhynchus	eutropia	130	27	0	27	15	0	15	USNM 21167	This Study
Cephalorhynchus	heavisidii	142	30	0	30	18	0	18	USNM 550067	This Study
Cetotherium	riabinini	326	51	0	51	37	0	37	NMNH-P 668/1	Goldin & Startsev, 2014
Chilcacetus	cavirhinus	271	0	39	39	0	0	0	MUSM 1401	Lambertet al. 2015
Coronodon	havensteini	328	0	0	85.72	0	0	65.61	CCNHM 108	Geisler et al. 2017
Cotylocara	macei	314.47	0	0	52.16	0	0	35.37	CCNHM-101	Churchill et al. 2016
Cynthiacetus	peruvianus	477.8	94.3	92.3	93.3	0	0	0	MNHN.F.PRU 10	Martínez-Cáceres & de Muizon, 2011
Dalanistes	ahmedi	260	72	72	72	43	43	43	GSP-UM 3106	Gingerich & Clyde, 1995
Delphinapterus	leucas	126	35	35	35	23	23	23	USNM 270085	This Study
Delphinapterus	leucas	239	39	39	39	24	24	24	USNM 275075	This Study
Delphinapterus	leucas	242	38	38	38	24	24	24	USNM 238106	This Study
Delphinus	delphis	436	51	51	51	25	25	25	USNM 550814	This Study
Diorocetus	hiatus	635	69.5	69.5	69.5	48.5	48.5	48.5	USMN 23949	This Study
Diunatans	luctoretemergo	750	0	101	101	0	81	81	NHG 22279	Bosselaers, 2010
Dorudon	atrox	324	71	0	71	58	0	58	BMNH 21896	This Study
Dorudon	atrox	352	89	88	88.5	61	64	62.5	UMMP 93220	This Study
Dorudon	atrox	424	75	0	75	68	0	68	UMMP 101222	This Study
Dorudon	atrox	486	97	0	97	63	0	63	UMMP 97512	This Study
Echovenator	sandersi	100.64	0	0	39.47	0	0	22.11	GSM 1098	Churchill et al. 2016
Ediscetus	osbornei	199	12.2	0	12.2	0	0	0	SC2015.33.1	Albright et al. 2018
Eschrichtius	robustus	691	93	93	93	65	65	65	USNM 504306	This Study
Eschrichtius	robustus	960	99	99	99	71	71	71	USNM 364979	This Study
Eschrichtius	robustus	1026	95	95	95	68	68	68	USNM 364973	This Study
Eubalaena	glacialis	2130	130	130	130	102	102	102	USNM 23077	This Study
Eubalaena	glacialis	2440	139	139	139	128	128	128	USNM 593893	This Study
Feresa	attenuata	178	35	35	35	22	0	22	USNM 593895	This Study
Feresa	attenuata	200	35	35	35	23	23	23	USNM 594386	This Study
Feresa	attenuata	231	40	40	40	24	24	24	USNM 594387	This Study
Fucaia	buelli	210	55.78	0	55.78	0	0	0	UWBM 84024	Marx et al. 2015
Gaviacetus	razai	270	63.5	63.5	63.5	44.5	44.5	44.5	GSP-UM 3095	Gingerich et al. 1995
gen.	sp.	157	49	49	49	34	34	34	USNM 244226	This Study
gen.	sp.	202	48	48	48	31	31	31	USNM 335480	This Study
Globicephala	macrorhynchus	267	40	40	40	24	24	24	USNM 550821	This Study
Globicephala	macrorhynchus	365	41	41	41	23	23	23	USNM 593826	This Study
Globicephala	macrorhynchus	378	46	46	46	23	23	23	USNM 5500232	This Study
Globicephala	macrorhynchus	384	42	42	42	27	27	27	USNM 500242	This Study
Globicephala	macrorhynchus	452	46	46	46	24	24	24	USNM 22570	This Study
Globicephala	melas	365	43	43	43	0	0	0	USNM 571349	This Study
Globicephala	melas	378	80	80	80	45	45	45	USNM 395361	This Study
Grampus	griseus	295	41	41	41	25	25	25	USNM 24224	This Study
Grampus	griseus	312	35	35	35	25	25	25	USNM 34613	This Study
Grampus	griseus	344	46	46	46	25	25	25	USNM 49895	This Study
Haborodelphis	japonicus	185	45	45	45	0	0	0	SMAC1390	Ichishima et 2019
Herpetocetus	Sendaicus	375	81	81	81	38	38	38	USNM-Md cast 362901	This Study
Horopeta	umarere	730	0	75.22	75.22	0	45.41	45.41	OU21982	Tsai & Fordyce, 2015
Hyperoodon	ampullatus	794	55	0	55	38	0	38	USNM 593417	This Study
Incakujira	anillodefuego	1000	0	89.5	89.5	0	56.3	56.3	GNHM Fs-098-12	Marx & Kohno, 2016
Indopacetus	pacificus	313	35	0	35	20	0	20	USNM 593534	This Study
Inia	geoffrensis	193	40	40	40	24	24	24	USNM 396166	This Study
Inia	geoffrensis	195	38	38	38	25	25	25	USNM 395614	This Study
Inia	geoffrensis	201	42	42	42	34	33	33.5	USNM 395602	This Study
Inia	geoffrensis	228	37	37	37	26	26	26	USNM 49582	This Study
Janjucetus	hunderi	346	62	62	62	42	42	42	NMV P216929	Fitzgerald, 2006
Kentriodon	pernix	142	0	29.7	29.7	0	0	0	USNM 10670	This Study
Kentriodon	nakajimai	122	27	28	27.5	15	15	15	GMNH-PV 95	Kimura & Hasegawa, 2019
Kentriodon	nakajimai	148	32	0	32	0	0	0	GMNH-PV 91	Kimura & Hasegawa, 2019
Kentriodon	nakajimai	155	29	29	29	18	18	18	GMNH-PV 3245	Kimura & Hasegawa, 2019
Kogia	sima	219	47	0	47	25	0	25	USNM 504518	This Study
Kogia	breviceps	268	63	63	63	40	40	40	USNM 594372	This Study
Kogia	breviceps	379	70	70	70	49	49	49	USNM 594426	This Study
Kogia	breviceps	383	65	65	65	41	41	41	USNM 594370	This Study
Kogia	breviceps	384	65	65	65	45	45	45	USNM 594421	This Study
Lagenodelphis	hosei	117	29	29	29	13	13	13	USNM 504410	This Study
Lagenodelphis	hosei	188	29	29	29	17	17	17	USNM 594200	This Study
Lagenodelphis	hosei	214	29	29	29	20	20	20	USNM 571619	This Study
Lagenorhynchus	australis	142	30	30	30	16	16	16	USNM 395346	This Study
Lagenorhynchus	obscurus	155	31	31	31	20	20	20	USNM 270418	This Study
Lagenorhynchus	obscurus	155	35	35	35	19	19	19	USNM 550744	This Study
Lagenorhynchus	obscurus	160	33	33	33	22	22	22	USNM 550743	This Study
Lagenorhynchus	actus	187	28	28	28	18	18	18	USNM 14277	This Study
Lagenorhynchus	actus	189	30	30	30	15	15	15	USNM 550914	This Study
Lagenorhynchus	actus	191	0	32	32	0	24	24	USNM 14281	This Study
Lagenorhynchus	actus	191	31	31	31	19	19	19	USNM 550913	This Study
Lagenorhynchus	actus	196	35	35	35	18	18	18	USNM 594795	This Study
Lagenorhynchus	actus	197	28	28	28	20	20	20	USNM 14278	This Study
Lagenorhynchus	albirostris	216	36	0	36	19	0	19	USNM 550224	This Study
Lagenorhynchus	albirostris	217	36	0	36	20	0	20	USNM 593990	This Study
Lagenorhynchus	albirostris	239	0	30	30	0	21	21	USNM 594176	This Study
Liolithax	pappus	238	38	0	38	0	0	0	USNM 15985	This Study
Lissodelphis	borealis	152	0	35	35	0	18	18	USNM 484929	This Study
Lissodelphis	borealis	162	30	30	30	17	17	17	USNM 594793	This Study
Lissodelphis	borealis	168	32	32	32	19	19	19	USNM 550188	This Study
Lissodelphis	peronii	191	35	0	35	20	0	20	USNM 501198	This Study
Llanocetus	denticrenatus	886	0	0	89	0	0	56	USNM 183022	This Study
Maiabalaena	nesbittae	519.3	0	0	65.2	0	0	34.4	USNM 314627	This Study
Maiacetus	inuus	282	0	0	61	0	0	49	GSP-UM 3475	de Muizon et al. 2019
Megaptera	miocaena	1216	0	93	93	0	60	60	USNM 10300	This Study
Megaptera	novaeangliae	2320	98	98	98	68	68	68	USNM 269982	This Study
Mesoplodon	peruvianus	201	45	0	45	31	0	31	USNM 571257	This Study
Mesoplodon	europaeus	224	41	0	41	30	0	30	USNM 594591	This Study
Mesoplodon	bidens	227	0	41	41	0	33	33	USNM 593438	This Study
Mesoplodon	stejnegeri	242	0	40	40	0	29	29	USNM 571362	This Study
Mesoplodon	densirostris	264	0	45	45	0	29	29	USNM 593538	This Study
Mesoplodon	grayi	266	48	0	48	30	0	30	USNM 550149	This Study
Mesoplodon	bidens	267	41	0	41	29	0	29	USNM 594220	This Study
Mesoplodon	europaeus	299	0	39	39	0	32	32	USNM 594593	This Study
Mesoplodon	europaeus	306	40	0	40	31	0	31	USNM 596594	This Study
Mesoplodon	densirostris	309	45	0	45	30	0	30	USNM 594595	This Study
Mesoplodon	densirostris	313	0	52	52	0	38	38	USNM 550952	This Study
Mesoplodon	ginkgodens	315	41	43	42	25	25	25	USNM 298237	This Study
Mesoplodon	mirus	322	37	37	37	29	29	29	USNM 504724	This Study
Mesoplodon	mirus	327	0	40	40	0	26	26	USNM 594404	This Study
Mesoplodon	stejnegeri	331	41	0	41	31	0	31	USNM 571361	This Study
Mesoplodon	mirus	335	38	38	38	27	27	27	USNM 504612	This Study
Mesoplodon	carlhubbsi	357	0	41	41	0	28	28	USNM 504128	This Study
Mesoplodon	hotaula	357	0	39	39	0	21	21	USNM 593426	This Study
Mesoplodon	layardii	407	51	0	51	25	0	25	USNM 550150	This Study
Messapicetus	gregarius	310	43.5	43.5	43.5	24.3	24.3	24.3	MUSM 1038	Bianucci et al. 2010
Messapicetus	gregarius	313	42	42	42	23.5	23.5	23.5	MUSM 1481	Bianucci et al. 2010
Metopocetus	hunteri	570	77.1	0	77.1	47.3	0	47.3	NMR 9991-07729	Marx et al. 2016
Monodon	monoceros	318	45	0	45	27	0	27	USNM 267960	This Study
Monodon	monoceros	365	49	49	49	26	26	26	USNM 267958	This Study
Monodon	monoceros	400	42	0	42	26	0	26	USNM 267957	This Study
Mystacodon	selenensis	399.6	0	0	42	0	0	35	MUSM 1917	de Muizon et al. 2019
Nazcacetus	urbinai	188	0	45	45	0	0	0	MUSM 949	Lambert, 2009
Neophocaena	phocaenoides	105	0	29	29	0	19	19	USNM 239990	This Study
Neophocaena	phocaenoides	110	28	28	28	17	17	17	USNM 240001	This Study
Neophocaena	phocaenoides	113	31	31	31	19	19	19	USNM 240002	This Study
Niparajacetus	palmadentis	650	68	0	68	47	47	47	MUEcSj5/24/123	Solis-Añorve et al. 2019
Olympicetus	avitus	145	0	50	50	0	35	35	LACM 126010	Vélez-Juarbe, 2017
Orcaella	brevirostris	147	37	37	37	23	23	23	USNM 486170	This Study
Orcaella	brevirostris	192	36	36	36	25	25	25	USNM 199743	This Study
Orcinus	orca	641	54	54	54	35	35	35	USNM 550857	This Study
Otekaikea	huata	265	0	0	0	0	14	14	OU 22306	Tanaka & Fordyce, 2015
Pakicetus	inachus	145	25.5	0	25.5	22.5	0	22.5	GSP-UM 084	Gingerich & Russell, 1981
Parietobalaena	palmeri	316	51	51	51	40	40	40	USNM-Md 10668	This Study
Parietobalaena	palmeri	322	51	52	51.5	29	27	28	USNM-Md 16838	This Study
Parietobalaena	palmeri	371	56	56	56	34	34	34	USNM 205950	This Study
Parietobalaena	palmeri	446	58	58	58	42	42	42	USNM-Md 10677	This Study
Parietobalaena	palmeri	333	56	56	56	32	32	32	Cat. No. 10668	Kellogg, 1924
Pelocetus	calvertensis	913	63	63	63	43	43	43	USNM-Md 11976	This Study
Peponocephala	electra	218	35	35	35	20	20	20	USNM 504502	This Study
Peponocephala	electra	238	32	32	32	20	20	20	USNM 504503	This Study
Peponocephala	electra	257	33	32	32.5	22	22	22	USNM 504504	This Study
Phocageneus	venustus	350	50	49.5	49.75	30.5	31.5	31	USNM 21039	This Study
Phocoena	phocoena	90	37	37	37	17	17	17	USNM 3507	This Study
Phocoena	phocoena	111	34	34	34	20	20	20	USNM 16610	This Study
Phocoena	sinus	111	20	0	20	15	0	15	USNM 395892	This Study
Phocoena	spinipinnis	119	31	31	31	19	19	19	USNM 550287	This Study
Phocoena	spinipinnis	123	30	30	30	19	19	19	USNM 550288	This Study
Phocoena	spinipinnis	129	29	29	29	16	16	16	USNM 550289	This Study
Phocoena	phocoena	135	30	30	30	22	22	22	USNM 274590	This Study
Phocoenoides	dalli	139	0	30	30	0	17	17	USNM 238038	This Study
Phocoenoides	dalli	143	36	36	36	16	16	16	USNM 251757	This Study
Phocoenoides	dalli	151	31	31	31	20	20	20	USNM 22556	This Study
Platanista	gangetica	145	52	52	52	34	34	34	USNM 23456	This Study
Pontoporia	blainvillei	85	22	22	22	12	12	12	USNM 482728	This Study
Pontoporia	blainvillei	92	22	22	22	16	16	16	USNM 482712	This Study
Pontoporia	blainvillei	95	23	23	23	12	12	12	USNM 482734	This Study
Pontoporia	blainvillei	100	22	22	22	15	15	15	USNM 482724	This Study
Pontoporia	blainvillei	102	22	22	22	15	15	15	USNM 482726	This Study
Pontoporia	blainvillei	103	20	20	20	15	17	16	USNM 482705	This Study
Pontoporia	blainvillei	106	20	20	20	15	15	15	USNM 482729	This Study
Pontoporia	blainvillei	108	25	21	23	16	19	17.5	USNM 482706	This Study
Pontoporia	blainvillei	108	22	22	22	16	16	16	USNM 482731	This Study
Pontoporia	blainvillei	109	19	19	19	17	17	17	USNM 482715	This Study
Pontoporia	blainvillei	109	0	20	20	0	15	15	USNM 482721	This Study
Pontoporia	blainvillei	111	0	22	22	0	12	12	USNM 482720	This Study
Pontoporia	blainvillei	111	22	22	22	17	17	17	USNM 482725	This Study
Pontoporia	blainvillei	112	22	22	22	13	13	13	USNM 482717	This Study
Pontoporia	blainvillei	112	24	24	24	18	18	18	USNM 482733	This Study
Pontoporia	blainvillei	113	23	23	23	12	12	12	USNM 482727	This Study
Pontoporia	blainvillei	114	23	23	23	16	16	16	USNM 482710	This Study
Pontoporia	blainvillei	115	21	21	21	14	14	14	USNM 482716	This Study
Pontoporia	blainvillei	116	30	32	31	16	18	17	USNM 49432	This Study
Pontoporia	blainvillei	118	26	25	25.5	21	22	21.5	USNM 482708	This Study
Pontoporia	blainvillei	118	23	23	23	14	14	14	USNM 482732	This Study
Pontoporia	blainvillei	121	0	24	24	0	15	15	USNM 482718	This Study
Pontoporia	blainvillei	122	19	19	19	14	14	14	USNM 482713	This Study
Pontoporia	blainvillei	124	22	22	22	15	15	15	USNM 501129	This Study
Pontoporia	blainvillei	128	22	22	22	17	17	17	USNM 482714	This Study
Pontoporia	blainvillei	132	23	26	24.5	18	16	17	USNM 482707	This Study
Pontoporia	blainvillei	132	25	25	25	18	18	18	USNM 482709	This Study
Pseudorca	crassidens	299	46	46	46	30	30	30	USNM 219325	This Study
Pseudorca	crassidens	312	48	48	48	30	30	30	USNM 485827	This Study
Pseudorca	crassidens	331	49	0	49	28	0	28	USNM 11320	This Study
Qaisracetus	arifi	280	0	65	65	0	48.5	48.5	GSP-UM 3316	Gingerich et al. 2001
Salishicetus	meadi	240	0	0	60	0	0	41	UWBM 50004	Peredo & Pyenson, 2018
Simocetus	rayi	176	0	0	24.33	0	0	13.63	USNM 256517	This Study
Sitsqwayk	cornishorum	690	0	63.05	63.05	0	47.32	47.32	UWBM 82916	Peredo & Uhen, 2016
Sotalia	fluviatilis	135	32	32	32	20	20	20	USNM 594512	This Study
Sousa	chinensis	146	35	0	35	20	0	20	USNM 258859	This Study
Stenella	longirostris	120	27	27	27	17	17	17	USNM 502339	This Study
Stenella	clymene	127	28	28	28	16	16	16	USNM 593552	This Study
Stenella	clymene	129	26	26	26	15	15	15	USNM 594184	This Study
Stenella	longirostris	129	25	25	25	16	16	16	USNM 502337	This Study
Stenella	longirostris	131	25	25	25	14	14	14	USNM 502341	This Study
Stenella	attenuata	139	28	28	28	15	15	15	USNM 395277	This Study
Stenella	clymene	140	27	27	27	17	17	17	USNM 550537	This Study
Stenella	attenuata	141	30	30	30	17	17	17	USNM 395279	This Study
Stenella	attenuata	141	29	29	29	17	17	17	USNM 395328	This Study
Stenella	frontalis	142	27	27	27	18	18	18	USNM 594008	This Study
Stenella	frontalis	160	30	0	30	18	0	18	USNM 593592	This Study
Stenella	frontalis	169	30	30	30	20	20	20	USNM 593898	This Study
Stenella	coeruleoalba	181	29	29	29	18	18	18	USNM 572853	This Study
Stenella	coeruleoalba	190	0	32	32	0	24	24	USNM 572294	This Study
Stenella	coeruleoalba	194	30	30	30	20	20	20	USNM 572695	This Study
Steno	bredanensis	144	36	36	36	20	20	20	USNM 504089	This Study
Steno	bredanensis	162	39	39	39	28	28	28	USNM 550368	This Study
Steno	bredanensis	178	40	40	40	22	22	22	USNM 504499	This Study
Taikicetus	inouei	280	85.5	0	85.5	45.5	0	45.5	AMP 35	Tanaka et al. 2018
Tasmacetus	shepherdi	523	51	51	51	41	41	41	USNM 484878	This Study
Tiucetus	rosae	401	71.8	0	71.8	44.2	0	44.2	MNHN.F. PPI261	Marx et al. 2017
Tohoraata	raekohao	493	40.6	0	40.6	22.28	0	22.28	OU 22178	Boessenecker & Fordyce, 2014
Tokarahia	kauaeroa	500	86.73	86.73	86.73	53.46	53.46	53.46	OU 22235	Boessnecker & Fordyce, 2015
Tokarahia	lophocephalus	648	92.17	0	92.17	55.98	0	55.98	OU 22081	Boessnecker & Fordyce, 2015
Tranatocetus	maregermanicum	860	99	0	99	82	0	82	NMR NMR9991-16680	Marx et al. 2019
Tupelocetus	palmeri	395	75.89	67.31	71.6	0	0	0	ChM PV6950	Gibson et al. 2019
Tursiops	truncatus	212	35	35	35	20	20	20	USNM 504618	This Study
Tursiops	truncatus	214	36	36	36	24	24	24	USNM 504656	This Study
Tursiops	truncatus	236	35	35	35	20	20	20	USNM 504726	This Study
Uranocetus	gramensis	296	91	91	91	63	63	63	MSM P 813	Steeman, 2009
Urkudelphis	chawpipacha	172	39.5	0	39.5	26.5	0	26.5	MO-1	Tanaka et al. 2017
Vampalus	sayasanicus	385	66	60	63	36	0	36	PIN, no. 5341	Tarasenko & Lopatin, 2012
Waharoa	ruwhenua	276	88.26	88.26	88.26	50.7	50.7	50.7	OU 22044	Boessenecker & Fordyce, 2015
Waharoa	ruwhenua	324	87.84	87.84	87.84	48.36	48.36	48.36	OU 22163	Boessenecker & Fordyce, 2015
Waipatia	maerewhenua	244	0	48.8	48.8	0	33.2	33.2	OU 22095	Fordyce, 1994
Wimahl	chinookensis	262	35.6	0	35.6	28.1	0	28.1	UWBM 88078	Peredo et al. 2018
Yamatocetus	canaliculatus	460	0	68.3	68.3	0	42.8	42.8	KMNH VP 000,017	Okazaki, 2012
Yaquinacetus	meadi	241	35	35	35	22	21	21.5	USNM 214705	This Study
Zarhachis	sp.	167	0	48	48	0	30	30	USNM 214759	This Study
Ziphiodelphis	sp.	231	33	34	33.5	22	21	21.5	USNM 214705	This Study
Ziphius	cavirostris	401	57	57	57	40	40	40	USNM 594501	This Study
Ziphius	cavirostris	455	0	57	57	0	36	36	USNM 530291	This Study
Ziphius	cavirostris	457	50	0	50	32	0	32	USNM 594597	This Study
Ziphius	cavirostris	466	51	0	51	38	0	38	USNM 506571	This Study
Ziphius	cavirostris	467	52	52	52	35	0	35	USNM 550122	This Study
Ziphius	cavirostris	471	58	0	58	24	0	24	USNM 504940	This Study
Ziphius	cavirostris	516	55	55	55	45	45	45	USNM 550111	This Study
Zygophyseter	varolai	745	0	0	0	0	35.9	35.9	MAUL 229/1	Bianucci & Landini, 2006
